# Supplementary material for: Visual monitoring of cisplatin-regulated caspase-3 activity in living cells based on a reduced graphene oxide-loaded fluorescent probe
Source: Royal Society of Chemistry journal article supplement (doi:10.1039/d4an01059k), 2024-01-01
Supplement: d4an01059k1.pdf [file d4an01059k1.pdf]

## Supplementary Information

### Visual monitoring of cisplatin-regulated caspase-3 activity in living cells based on reduced graphene oxide-loaded fluorescent probe

Qing Liu<sup>a</sup>, Hongyan Zhou<sup>b</sup>, Wei Zhang<sup>c</sup>, Chuan Zhao<sup>d</sup>, Xueqing Tao<sup>a</sup>, Chunyi Tong<sup>a,\*</sup>,  
Bin Liu<sup>a,\*\*</sup>

<sup>a</sup> College of Biology, Hunan University, Changsha, 410082, China

<sup>b</sup> Precision Pharmacy & Drug Development Center, Department of Pharmacy, Second Affiliated Hospital, Air Force Medical University, Xi'an, 710038, China

<sup>c</sup> Neurology Department of Xiangtan Central Hospital, XiangTan, 411199, China

<sup>d</sup> Institute of Bast Fiber Crops, Chinese Academy of Agricultural Sciences, Changsha, Hunan 410205, China

\* Corresponding author: Chunyi Tong,\* Bin Liu,\*\*

\*Chunyi Tong

College of Biology of Hunan University, 27, Tianma Road, Changsha, Hunan, China, 410082

Email address: sw\_tcy@hnu.edu.cn

\*\*Bin Liu

College of Biology of Hunan University, 27, Tianma Road, Changsha, Hunan, China, 410082

E-mail address: binliu2001@hotmail.com

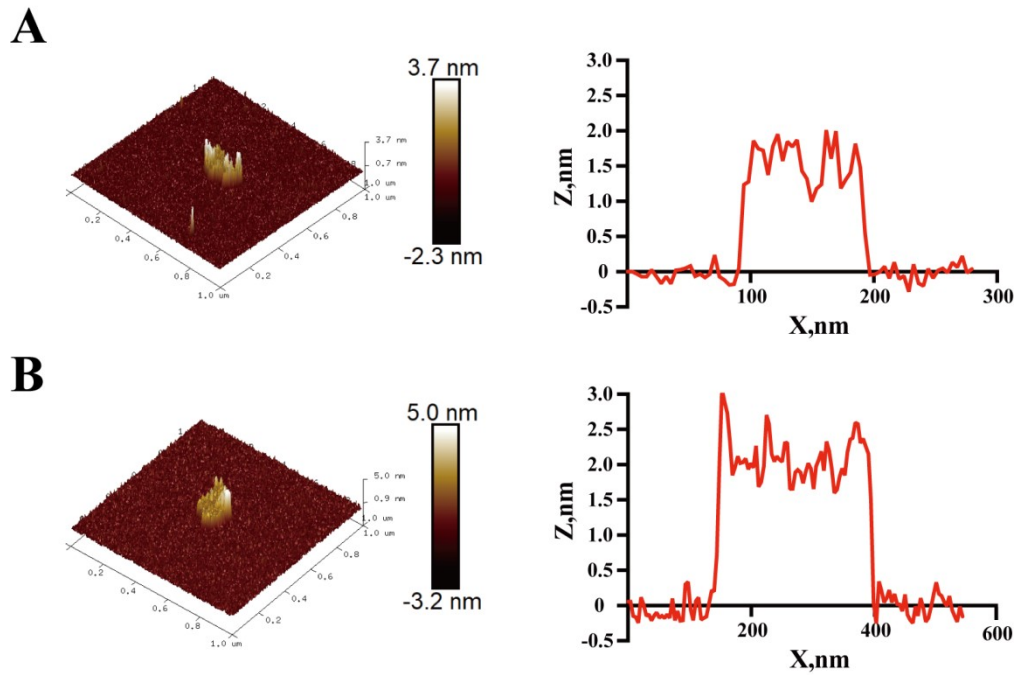

Fig. S1 The AFM images of rGO (A) and rGO with P(B).

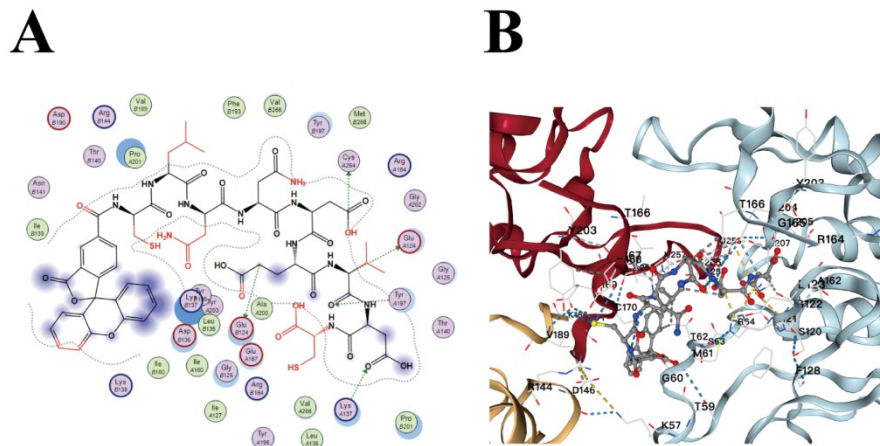

Fig. S2 (A) Diagram depicting the interaction between probe and Caspase-3. (B) 3D simulation of molecular docking of probe and Caspase-3. The docked ligand was shown as a stick model. The hydrogen-bonds are shown as blue lines.

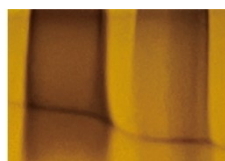

**P P + caspase-3**

Fig. S3 Nondenaturing polyacrylamide gel electrophoresis (PAGE, 12%) of the

products for the detection of the caspase-3. Lane 1: P; Lane 2: P+caspase-3.

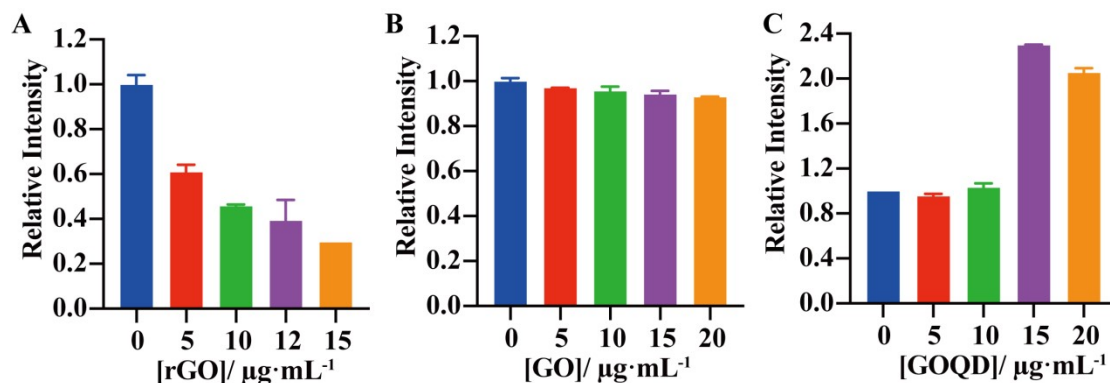

Fig. S4 The histogram of fluorescence intensity at 521 nm.

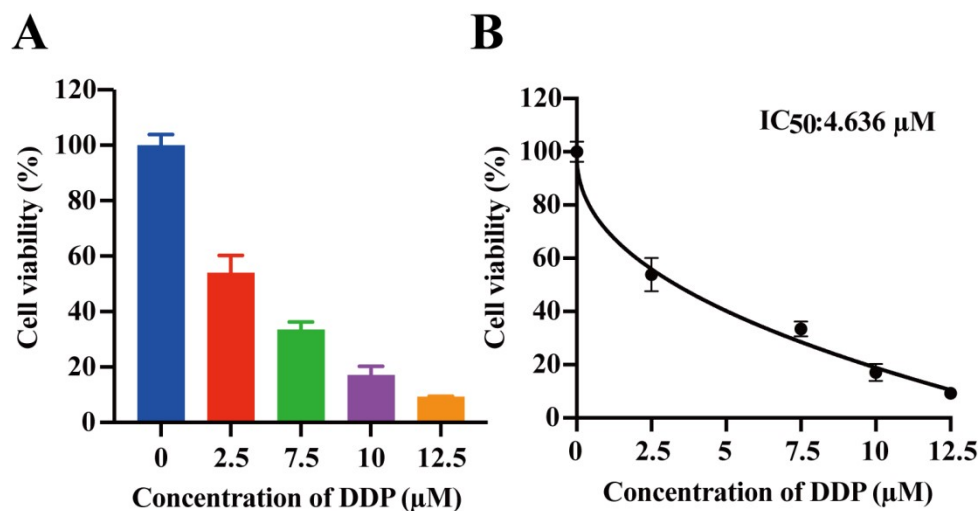

Fig. S5 The graph of cell viability of MCF-7 cells by DDP for 24 h.

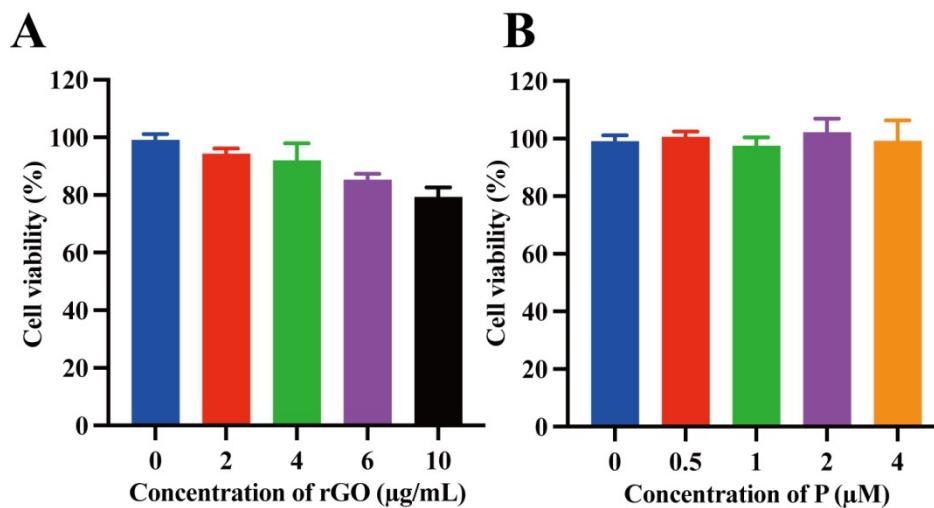

Fig. S6 Cell viability of MCF-7 cells incubating with rGO (A) and probe P (B) for 24 h.
